# Supplementary material
Source: PubMed Central journal article supplement (PMC1895954)
Supplement: pnas_0608968104_1.pdf [file pnas_0608968104_1.pdf]

**Table 4. Summary of data used in the analysis: measurement temperature ( $T_m$ ), index of microhabitat oxygen availability ( $O_2$ ), body mass ( $M$ ), discontinuous gas-exchange cycle (DGC) duration, rate of  $CO_2$  production ( $VCO_2$ ), capture latitude and longitude, habitat precipitation ( $P$ ), and habitat ambient temperature ( $T_a$ )**

| Species                    | $T_m$ , °C | $O_2$ | $M$ , mg | DGC, s | $VCO_2$ ,<br>ml·h <sup>-1</sup> | Latitude, ° | Longitude, ° | $P$ ,<br>mm·mo <sup>-1</sup> | $T_a$ , °C | Reference<br>No. |
|----------------------------|------------|-------|----------|--------|---------------------------------|-------------|--------------|------------------------------|------------|------------------|
| Blattodea                  |            |       |          |        |                                 |             |              |                              |            |                  |
| Blaberidae                 |            |       |          |        |                                 |             |              |                              |            |                  |
| <i>Perisphaeria</i> sp.    | 20         | 3     | 314.8    | 1565.4 | 0.0207                          | -33.6       | 18.5         | 60.7                         | 16.4       | 1                |
| Unknown sp.                | 20         | 3     | 2540     | 633.3  | 0.0910                          | -32.1       | 19.2         | 52.8                         | 15.3       | 2                |
| Coleoptera                 |            |       |          |        |                                 |             |              |                              |            |                  |
| Carabidae                  |            |       |          |        |                                 |             |              |                              |            |                  |
| <i>Carenum</i> sp.         | 25         | 2     | 4240     | 928.8  | 0.348                           | -24.4       | 139.5        | 17.3                         | 23.4       | 3                |
| <i>Carenum</i> sp.         | 20         | 2     | 4610     | 1785.7 | 0.294                           | -24.4       | 139.5        | 17.3                         | 23.4       | 3                |
| <i>Carenum</i> sp.         | 30         | 2     | 4390     | 467.3  | 0.507                           | -24.4       | 139.5        | 17.3                         | 23.4       | 3                |
| <i>Carenum</i> sp.         | 35         | 2     | 3430     | 346.0  | 0.602                           | -24.4       | 139.5        | 17.3                         | 23.4       | 3                |
| <i>Cerotalis</i> sp.       | 25         | 2     | 562      | 712.2  | 0.068                           | -24.4       | 139.5        | 17.3                         | 23.4       | 3                |
| <i>Cerotalis</i> sp.       | 20         | 2     | 606.8    | 1587.3 | 0.0472                          | -24.4       | 139.5        | 17.3                         | 23.4       | 3                |
| <i>Cerotalis</i> sp.       | 30         | 2     | 552.3    | 473.9  | 0.0694                          | -24.4       | 139.5        | 17.3                         | 23.4       | 3                |
| <i>Cerotalis</i> sp.       | 35         | 2     | 559.6    | 367.6  | 0.0834                          | -24.4       | 139.5        | 17.3                         | 23.4       | 3                |
| <i>Cerotalis</i> sp.       | 40         | 2     | 557.8    | 204.1  | 0.117                           | -24.4       | 139.5        | 17.3                         | 23.4       | 3                |
| Scarabaeidae               |            |       |          |        |                                 |             |              |                              |            |                  |
| <i>Aphodius fossor</i>     | 15         | 0     | 121.3    | 999.4  | 0.0200                          | 55.6        | 12.2         | 47.7                         | 8.0        | 4                |
| <i>Circellium bacchus</i>  | 23         | 2     | 7410     | 4176.0 | 0.321                           | -33.2       | 25.4         | 25.6                         | 18.0       | 5                |
| <i>Cyclocephala colasi</i> | 20.4       | 3     | 240.2    | 607.1  | 0.0454                          | 5.3         | -52.8        | 272.6                        | 25.7       | 6                |
| <i>Cyclocephala colasi</i> | 25.2       | 3     | 248.6    | 416.8  | 0.0648                          | 5.3         | -52.8        | 272.6                        | 25.7       | 6                |
| <i>Cyclocephala colasi</i> | 30.1       | 3     | 254.0    | 382.8  | 0.0976                          | 5.3         | -52.8        | 272.6                        | 25.7       | 6                |
| <i>Cyclocephala colasi</i> | 34.9       | 3     | 296.3    | 224.1  | 0.159                           | 5.3         | -52.8        | 272.6                        | 25.7       | 6                |
| <i>Scarabaeus galenus</i>  | 24         | 2     | 1681     | 1694.0 | 0.123                           | -25.4       | 31.8         | 48.8                         | 21.7       | 7 and 8          |
| <i>Scarabaeus galenus</i>  | 16         | 2     | 1256     | 7228.0 | 0.0319                          | -25.4       | 31.8         | 48.8                         | 21.7       | 8                |

| Species                      | $T_m$ , °C | O <sub>2</sub> | $M$ , mg | DGC, s | VCO <sub>2</sub> , ml·h <sup>-1</sup> | Latitude, ° | Longitude, ° | $P$ , mm·mo <sup>-1</sup> | $T_a$ , °C | Reference No. |
|------------------------------|------------|----------------|----------|--------|---------------------------------------|-------------|--------------|---------------------------|------------|---------------|
| <i>Scarabaeus galenus</i>    | 20         | 2              | 1596     | 2689.0 | 0.0744                                | -25.4       | 31.8         | 48.8                      | 21.7       | 8             |
| <i>Scarabaeus galenus</i>    | 28         | 2              | 1398     | 2777.0 | 0.108                                 | -25.4       | 31.8         | 48.8                      | 21.7       | 8             |
| <i>Scarabaeus galenus</i>    | 32         | 2              | 1406     | 3203.0 | 0.146                                 | -25.4       | 31.8         | 48.8                      | 21.7       | 8             |
| <i>Scarabaeus gariepinus</i> | 24         | 2              | 1130     | 6207.0 | 0.0372                                | -29.6       | 17.3         | 10.6                      | 15.9       | 7 and 8       |
| <i>Scarabaeus gariepinus</i> | 16         | 2              | 1186     | 8110.0 | 0.0180                                | -29.6       | 17.3         | 10.6                      | 15.9       | 8             |
| <i>Scarabaeus gariepinus</i> | 20         | 2              | 1158     | 9243.0 | 0.0241                                | -29.6       | 17.3         | 10.6                      | 15.9       | 8             |
| <i>Scarabaeus gariepinus</i> | 28         | 2              | 1097     | 3038.0 | 0.0527                                | -29.6       | 17.3         | 10.6                      | 15.9       | 8             |
| <i>Scarabaeus gariepinus</i> | 32         | 2              | 1055     | 2027.0 | 0.0733                                | -29.6       | 17.3         | 10.6                      | 15.9       | 8             |
| <i>Scarabaeus rusticus</i>   | 24         | 2              | 1061     | 3421.0 | 0.0906                                | -25.6       | 27.2         | 51.4                      | 17.7       | 7 and 8       |
| <i>Scarabaeus rusticus</i>   | 16         | 2              | 1057     | 6556.0 | 0.0368                                | -25.6       | 27.2         | 51.4                      | 17.7       | 8             |
| <i>Scarabaeus rusticus</i>   | 20         | 2              | 1050     | 5186.0 | 0.0581                                | -25.6       | 27.2         | 51.4                      | 17.7       | 8             |
| <i>Scarabaeus rusticus</i>   | 28         | 2              | 1081     | 2542.0 | 0.1379                                | -25.6       | 27.2         | 51.4                      | 17.7       | 8             |
| <i>Scarabaeus rusticus</i>   | 32         | 2              | 1073     | 1565.0 | 0.1807                                | -25.6       | 27.2         | 51.4                      | 17.7       | 8             |
| <i>Scarabaeus striatum</i>   | 20         | 2              | 753      | 3841.0 | 0.0322                                | -29.8       | 17.4         | 10.6                      | 15.9       | 7 and 8       |
| <i>Scarabaeus striatum</i>   | 16         | 2              | 885      | 6340.0 | 0.0167                                | -29.8       | 17.4         | 10.6                      | 15.9       | 8             |
| <i>Scarabaeus striatum</i>   | 20         | 2              | 753      | 3841.0 | 0.0322                                | -29.8       | 17.4         | 10.6                      | 15.9       | 8             |
| <i>Scarabaeus striatum</i>   | 28         | 2              | 684      | 1459.0 | 0.0484                                | -29.8       | 17.4         | 10.6                      | 15.9       | 8             |
| <i>Scarabaeus westwoodi</i>  | 24         | 2              | 1758     | 2270.0 | 0.169                                 | -29.6       | 29.4         | 67.7                      | 12.4       | 7 and 8       |
| <i>Scarabaeus westwoodi</i>  | 16         | 2              | 1905     | 4919.0 | 0.0865                                | -29.6       | 29.4         | 67.7                      | 12.4       | 8             |
| <i>Scarabaeus westwoodi</i>  | 20         | 2              | 1741     | 3864.0 | 0.116                                 | -29.6       | 29.4         | 67.7                      | 12.4       | 8             |
| <i>Scarabaeus westwoodi</i>  | 28         | 2              | 1689     | 1715.0 | 0.233                                 | -29.6       | 29.4         | 67.7                      | 12.4       | 8             |
| <i>Scarabaeus westwoodi</i>  | 32         | 2              | 1890     | 1311.0 | 0.320                                 | -29.6       | 29.4         | 67.7                      | 12.4       | 8             |
| Tenebrionidae                |            |                |          |        |                                       |             |              |                           |            |               |
| <i>Cardiosis faimarei</i>    | 30         | 2              | 32       | 370.4  | 0.00600                               | -23.6       | 15.0         | 7.9                       | 16.0       | 9             |
| <i>Epiphysa arenicola</i>    | 30         | 2              | 1237     | 344.8  | 0.0951                                | -23.6       | 15.0         | 7.9                       | 16.0       | 9             |
| <i>Onymacris laeviceps</i>   | 30         | 2              | 525      | 333.3  | 0.0867                                | -23.6       | 15.0         | 7.9                       | 16.0       | 9             |
| <i>Onymacris plana</i>       | 30         | 2              | 767      | 270.3  | 0.188                                 | -23.6       | 15.0         | 7.9                       | 16.0       | 9             |

| Species                          | $T_m$ , °C | O <sub>2</sub> | $M$ , mg | DGC, s | VCO <sub>2</sub> , ml·h <sup>-1</sup> | Latitude, ° | Longitude, ° | $P$ , mm·mo <sup>-1</sup> | $T_a$ , °C | Reference No. |
|----------------------------------|------------|----------------|----------|--------|---------------------------------------|-------------|--------------|---------------------------|------------|---------------|
| <i>Onymacris rugatipennis a.</i> | 30         | 2              | 573      | 303.0  | 0.117                                 | -23.6       | 15.0         | 7.9                       | 16.0       | 9             |
| <i>Onymacris rugatipennis r.</i> | 30         | 2              | 496      | 370.4  | 0.0904                                | -23.6       | 15.0         | 7.9                       | 16.0       | 9             |
| <i>Onymacris unguicularis</i>    | 25         | 2              | 737      | 1602.0 | 0.0221                                | -23.6       | 15.0         | 7.9                       | 16.0       | 10            |
| <i>Onymacris unguicularis</i>    | 30         | 2              | 585      | 312.5  | 0.127                                 | -23.6       | 15.0         | 7.9                       | 16.0       | 9             |
| <i>Physadesmia globosa</i>       | 30         | 2              | 516      | 153.8  | 0.1215                                | -23.6       | 15.0         | 7.9                       | 16.0       | 9             |
| <i>Pimelia canescens</i>         | 25         | 3              | 312      | 878.4  | 0.0360                                | 30.6        | 34.8         | 16.8                      | 19.3       | 11            |
| <i>Pimelia grandis</i>           | 25         | 3              | 1617     | 846.0  | 0.335                                 | 30.6        | 34.8         | 16.8                      | 19.3       | 12            |
| <i>Psammodes striatus</i>        | 20         | 2              | 2800     | 882.4  | 0.364                                 | -32.3       | 18.4         | 24.4                      | 16.5       | 13            |
| <i>Stenocara gracilipes</i>      | 30         | 2              | 268      | 243.9  | 0.0965                                | -23.6       | 15.0         | 7.9                       | 16.0       | 9             |
| <i>Zophosis complanata</i>       | 25         | 3              | 112      | 676.2  | 0.0200                                | 30.6        | 34.8         | 16.8                      | 19.3       | 11            |
| <i>Zophosis orbicularis</i>      | 30         | 2              | 103      | 250.0  | 0.0246                                | -23.6       | 15.0         | 7.9                       | 16.0       | 9             |
| <i>Zophosis punctata</i>         | 25         | 3              | 70       | 621.0  | 0.0140                                | 30.6        | 34.8         | 16.8                      | 19.3       | 11            |
| Trogidae                         |            |                |          |        |                                       |             |              |                           |            |               |
| <i>Omorgus radula</i>            | 25         | 2              | 207      | 2379.0 | 0.0153                                | -24.6       | 31.3         | 62.4                      | 20.4       | 14            |
| Hymenoptera                      |            |                |          |        |                                       |             |              |                           |            |               |
| Formicidae                       |            |                |          |        |                                       |             |              |                           |            |               |
| <i>Camponotus detritus</i>       | 30         | 1              | 40.9     | 304.9  | 0.0101                                | -23.6       | 15.0         | 7.9                       | 16.0       | 15            |
| <i>Camponotus maculatus</i>      | 25         | 1              | 10.1     | 152.4  | 0.00196                               | -26.3       | 28.0         | 54.4                      | 16.1       | 16            |
| <i>Camponotus vicinus</i>        | 15         | 1              | 57       | 442.5  | 0.00508                               | 33.8        | -117.0       | 16.9                      | 12.3       | 17            |
| <i>Camponotus vicinus</i>        | 20         | 1              | 57       | 218.1  | 0.00688                               | 33.8        | -117.0       | 16.9                      | 12.3       | 17            |
| <i>Camponotus vicinus</i>        | 25         | 1              | 57       | 128.2  | 0.00932                               | 33.8        | -117.0       | 16.9                      | 12.3       | 17            |
| <i>Camponotus vicinus</i>        | 30         | 1              | 57       | 82.7   | 0.0126                                | 33.8        | -117.0       | 16.9                      | 12.3       | 17            |
| <i>Camponotus vicinus</i>        | 35         | 1              | 57       | 44.2   | 0.0171                                | 33.8        | -117.0       | 16.9                      | 12.3       | 17            |

| Species                                                   | $T_m$ , °C | O <sub>2</sub> | $M$ , mg | DGC, s | VCO <sub>2</sub> ,<br>ml·h <sup>-1</sup> | Latitude, ° | Longitude, ° | $P$ ,<br>mm·mo <sup>-1</sup> | $T_a$ , °C | Reference<br>No. |
|-----------------------------------------------------------|------------|----------------|----------|--------|------------------------------------------|-------------|--------------|------------------------------|------------|------------------|
| <i>Cataglyphis bicolor</i>                                | 25         | 1              | 34       | 523.0  | 0.00560                                  | 34.5        | 10.5         | 16.9                         | 19.2       | 18               |
| <i>Cataglyphis bicolor</i>                                | 25         | 1              | 34       | 657.0  | 0.00590                                  | 34.5        | 10.5         | 16.9                         | 19.2       | 19               |
| <i>Messor julianus</i><br><i>alates/workers</i>           | 24         | 1              | 5.09     | 102.8  | 0.00099<br>0                             | 29.5        | -114.4       | 9.3                          | 18.4       | 20               |
| <i>Pogonomyrmex</i><br><i>californicus</i>                | 25         | 1              | 5.92     | 359.7  | 0.00165                                  | 37.4        | -118.4       | 15.5                         | 7.7        | 21               |
| <i>Pogonomyrmex</i><br><i>occidentalis</i>                | 25         | 1              | 7.96     | 154.3  | 0.00227                                  | 39.2        | -111.0       | 19.2                         | 5.6        | 21               |
| <i>Pogonomyrmex</i><br><i>rugosus</i>                     | 25         | 1              | 14.3     | 212.8  | 0.00490                                  | 37.1        | -113.6       | 18.3                         | 10.6       | 21               |
| <i>Pogonomyrmex</i><br><i>rugosus</i>                     | 25         | 1              | 32.2     | 934.6  | 0.00512                                  | 33.5        | -112.0       | 13.3                         | 20.0       | 22               |
| Mutillidae<br><i>Dasymutilla gloriosa</i>                 | 30         | 2              | 76.45    | 176.4  | 0.0390                                   | 35.4        | -115.6       | 12.8                         | 17.1       | 23               |
| Lepidoptera<br>Lasiocampidae<br><i>Gonometa postica P</i> | 20         | 3              | 4367.5   | 9353.4 | 0.0313                                   | -24.4       | 22.8         | 26.3                         | 20.4       | 24               |
| Orthoptera<br>Acrididae<br><i>Romalea guttata</i>         | 25         | 3              | 2921     | 1494.0 | 0.388                                    | 26.4        | -81.4        | 116.3                        | 24.0       | 25               |
| Ramoleidae<br><i>Taeniopoda eques</i>                     | 15         | 3              | 2300     | 2736.0 | 0.134                                    | 31.9        | -109.1       | 11.9                         | 16.1       | 26               |

## References

1. Marais E, Chown SL (2003) *J Exp Biol* 206:4565–4574.
2. Marais E, Klok CJ, Terblanche JS, Chown SL (2005) *J Exp Biol* 208:4495–4507.

3. Duncan FD, Dickman CR (2001) *Oecologia* 129:509–517.
4. Chown SL, Holter P (2000) *J Exp Biol* 203:397–403.
5. Duncan FD, Byrne MJ (2002) *J Exp Biol* 205:2489–2497.
6. White CR, Seymour RS, Gibernau M, unpublished data.
7. Davis ALV, Chown SL, Scholtz CH (1999) *Physiol Biochem Zool* 72:555–565.
8. Chown SL, Davis ALV (2003) *J Exp Biol* 206:3547–3556.
9. Lighton JRB (1991) *J Exp Biol* 159:249–268.
10. Louw GN, Nicolson SW, Seely MK (1986) *J Exp Biol* 120:443–447.
11. Duncan FD, Krasnov B, McMaster M (2002) *J Exp Biol* 205:791–798.
12. Duncan FD, Krasnov B, McMaster M (2002) *Physiol Entomol* 21:79–83.
13. Lighton JRB (1988) *J Insect Physiol* 34:361–367.
14. Bosch M, Chown SL, Scholtz CH (2000) *Physiol Entomol* 25:309–314.
15. Lighton JRB (1990) *J Exp Biol* 151:71–82.
16. Duncan FD, Newton RD (2000) *J Insect Physiol* 46:1529–1534.
17. Lighton JRB (1988) *J Exp Biol* 134:363–376.
18. Lighton JRB, Fukushi T, Wehner R (1993) *J Insect Physiol* 39:687–699.
19. Lighton JRB, Wehner R (1993) *J Comp Physiol B* 163:11–17.
20. Lighton JRB, Berrigan D (1995) *J Exp Biol* 198:521–530.
21. Quinlan MC, Lighton JRB (1999) *Physiol Entomol* 24:293–302.
22. Lighton JRB, Garrigan DA, Duncan FD, Johnson RA (1993) *J Exp Biol* 179:233–244.
23. Duncan FD, Lighton JRB (1997) *Physiol Entomol* 22:310–315.
24. J.S.T., C. J. Klok, and R. Veldtman, unpublished data.
25. Hadley NF, Quinlan MC (1993) *J Exp Biol* 177:169–180.
26. Harrison JF, Hadley NF, Quinlan MC (1995) *J Exp Biol* 198:1755–1763.
